# Supplementary material for: Advanced reactivity-based sequencing methods for mRNA epitranscriptome profiling
Source: RSC Chem Biol. 2024 Dec 10;6(2):150–69. doi: 10.1039/d4cb00215f (PMC11694185; doi:10.1039/d4cb00215f)
Supplement: CB-006-D4CB00215F-s001 [file CB-006-D4CB00215F-s001.xlsx]

## Sheet: Sheet1
RNA modifications	Methods	Classification	Principle	Results	Advantages	Disadvantages	Single-base level or not	Stoichiometric or not	Avaliable direct-use bioinformatic pipeline
	DART-seq	Enzymic	This APOBEC1-YTH fusion protein induces C-to-U deamination at sites adjacent to m6A residues	Misincorporation (adjacent C-to-U)	Low RNA input enables use at the single-cell level	Only applicable to in vivo applications and challenging for transfection in difficult cell lines, leading to a high rate of false negatives	Yes	No	https://github.com/mflamand/Bullseye
m6A	scDART-seq	Enzymic							https://doi.org/10.5281/zenodo.6869039
	m6A-REF-seq	Enzymic	MazF specifically cleaves the unmethylated 5ʹ-ACA-3ʹ motif, enabling the distinction between m6A and A	Truncation	Low RNA input with high sensitivity and specificity	Sequence preference is easily influenced by secondary structure	Yes	Yes	https://github.com/SchwartzLab/mazter_mine
	MAZTER-seq	Enzymic							https://github.com/Epigenomics-Lab/m6A-REF-seq/
	m6A-SEAL	Enzymic and chemical	m6A is first oxidized to hm6A by FTO and subsequently converted to dm6A through thiol addition, allowing dm6A to be conjugated to biotin molecules for streptavidin pulldown	Enrichment region	High sensitivity and specificity, with potential to distinguish between m6A and m6Am	FTO is not commercially available; skill training and mass spectrometry monitoring are required	No	No	https://github.com/Wyeast
	m6A-label-seq	Enzymic and chemical	m6A is converted to a6A through metabolic labeling with Se-allyl-L-selenohomocysteine, and a6A RNA can then be further converted to cyc-A, which induces misincorporations during cDNA synthesis	Misincorporation (m6A-to-A/U/C/G)	Exhibits high specificity	Low incorporation and chemical transformation efficiency, with SeAM potentially inducing cell stress	Yes	No	https://doi.org/10.1016/j.xpro.2021.101096
	m6A-SAC-seq	Enzymic and chemical	m6A is converted to a6m6A by specific dimethyltransferases, and cyclized a6m6A can induce misincorporation during cDNA synthesis	Misincorporation (m6A-to-A/U/C/G)	Low RNA input combined with high sensitivity	FTO is not commercially available and has a sequence preference, requiring high sequencing depth	Yes	Yes	https://github.com/y9c/m6A-SACseq
	m6A-ORL-seq	Chemical	m6A is converted to Am6A and biotin labeled by three-step chemical reaction—oxidation, reduction, and functional labeling, which can be enriched by streptavidin pulldown	Enrichment region	Demonstrates high sensitivity	RNA degradation occurs, necessitating high sequencing depth	Yes	No	https://github.com/sqhan-whu/m6A-ORL-Seq
	NOseq	Chemical	A is converted to I and m6A is converted to NO-m6A by deamination process, which can induce misincorporations during cDNA synthesis	Misincorporation (A-to-G)	Features a short pipeline and is cost-effective	Low reaction efficiency coupled with a high RNA degradation rate	Yes	No	https://doi.org/10.1093/nar/gkaa1173
	eTAM-seq	Chemical	A is converted to I by TadA8.20, which can induce misincorporations during cDNA synthesis	Misincorporation (A-to-G)	Low RNA input with high specificity	TadA8.20 is not commercially available; it is sensitive to secondary structure, and other adenine modifications may resist deamination, leading to low sensitivity	Yes	No	https://github.com/shunliubio/eTAM-seq_workflow
	GLORI	Chemical	Nitrite can efficiently deaminate unmethylated adenosine into inosine, achieving an A-to-I conversion, which can induce misincorporations during cDNA synthesis	Misincorporation (A-to-G)	Exhibits high sensitivity and specificity	RNA degradation necessitates high sequencing depth	Yes	Yes	https://github.com/liucongcas/GLORI-tools
m1A	m1A-ID-seq	Enzymic and chemical	m1A is enriched through immunoprecipitation using an m1A antibody and is detected by truncation during cDNA synthesis	Truncation	One of the first methods for transcriptome-wide m1A detection	The truncation rate is low, preventing single-base resolution	No	No	None
	m1A-MAP	Enzymic and chemical		Misincorporation (m1A-to-T)	Demonstrates high sensitivity	Stoichiometry for m1A sites is not always accurate, requiring high sequencing depth	Yes	Yes	None
	m1A-IP-seq	Enzymic and chemical			Offers high sensitivity and accuracy	RT-1306 is not commercially available and lacks a linear calibration curve	Yes	Yes	https://doi.org/10.1038/s41592-019-0550-4
	m1A-seq	Chemical	Involves treating precipitated m1A-containing mRNA fragments with an alkaline buffer to chemically rearrange m1A to m6A before cDNA synthesis	Truncation	Exhibits high sensitivity and specificity	High RNA degradation rates necessitate increased sequencing depth	Yes	No	None
	m1A-seq-TGIRT	Chemical		Misincorporation (m1A-to-T)			Yes	Yes	None
m5C	RBS-seq	Chemical	Based on the chemical deamination of cytosines using sodium bisulfiteuses, which can deaminate unmethylated cytosines into uridines, causing misincorporations during cDNA synthesis	Misincorporation (C-to-T)	High conversion efficiency	RNA degradation occurs; the method is sensitive to RNA secondary structure and cannot distinguish between hm5C and m5C	Yes	Yes	https://github.com/HuntsmanCancerInstitute/RBSSeqTools
	UBS-seq	Chemical	Modified from RBS-seq, using ammonium salts of bisulfite and sulfite to treat RNA to obtain both high conversion rate and low RNA degradation	Misincorporation (C-to-T)	High conversion efficiency with relatively low RNA input and minimal degradation	Sensitive to RNA secondary structure and unable to distinguish from hm5C and m5C	Yes	Yes	https://github.com/y9c/m5C-UBSseq
	Aza-IP	Enzymic	Cytidine analog 5-AzaC is used to incorporate into nascent RNA, which affects the release of methyl transferase, and specific C-to-G conversion can be observed at targeted C residues	Misincorporation (m5C-to-G)	Achieves single-base resolution	Non-specific antibody binding and the mislocalization of methyltransferases	Yes	No	https://doi.org/10.1038/nprot.2014.014
	miCLIP	Enzymic	Utilizes NSUN2 (C271A) impedes the release of enzymes from the protein-RNA complex, resulting in truncation during reverse transcription	Truncation	Exhibits a high truncation rate		Yes	No	None
	m5C-TAC-seq	Chemical	m5C is first oxidized to f5C, then labeled with an azido derivative, facilitating the enrichment of m5C-containing RNAs via biotin pull-down and induces misincorporations during cDNA synthesis	Misincorporation (m5C-to-T)	Allows for direct m5C detection	The procedure is verbose and requires skill training and certain chemical small molecules are difficult to obtain.	Yes	No	https://github.com/xting1996/Project_m5C
ac4C	ac4C-seq	Chemical	ac4C is converted into H4-ac4C by treated with NaCNBH3 under acidic conditions, which causes misincorporations during cDNA synthesis	Misincorporation (ac4C-to-T)	One of the first methods for transcriptome-wide ac4C detection	High sample input is required, along with increased sequencing depth.	Yes	No	https://doi.org/10.1038/s41596-021-00501-9
	FAM-seq	Enzymic and chemical	Cytidine is acetylated by F-Ac-CoA, which turns to be biotin-labeled and enriched.	Enrichment region	Exhibits high specificity and accuracy	Adding NaF to cells is toxic	No	No	None
	RedaC:T-seq	Chemical	ac4C is converted into tetrahydro-ac4C using NaBH4, which induces misincorporations during reverse transcription	Misincorporation (ac4C-to-T)	Demonstrates high specificity	Irreproducibility of mismatch patterns and severe technical biases	Yes	No	None
	RetraC:T-seq	Chemical	ac4C is converted into tetrahydro-ac4C using NaBH4, which induces misincorporations during reverse transcription using 2-NH2-dATP instead of dATP.	Misincorporation (ac4C-to-T)	Exhibits high specificity and accuracy	High background signal results from the use of 2-NH2-dATP	Yes	No	None
m7G	m7G-seq	Chemical	m7G site is converted to abasic site under NaBH4-mediated reduction and labeled by hydrazide-biotin, which is enriched and induces misincorporations during cDNA synthesis	Misincorporation (m7G-to-A/U/C/G)	Demonstrates high specificity	RNA degradation occurs, and the miscorporation during cDNA synthesis is not sufficient	Yes	No	https://github.com/genome/ bam-readcount
	m7G-MaP-seq	Chemical	m7G site is converted to abasic site under NaBH4-mediated reduction and induces misincorporations during cDNA synthesis	Misincorporation (m7G-to-A/U/C/G)			Yes	No	https://github.com/jeppevinther/m7g_map_seq
Ψ	Ψ-seq	Chemical	The CMC-Ψ adduct from CMC and Ψ allows misincorporations during cDNA synthesis	Truncation	Exhibits high specificity along with a high truncation rate	There is a risk of missing low-abundance pseudouridylation and certain chemical small molecules are difficult to obtain	Yes	No	None
	PSI-seq	Chemical							None
	pseudo-seq	Chemical							None
	CeU-seq	Chemical	It replaces CMC with N3-CMC in the CMC-Ψ adduct, introducing an enrichment step that enhances misincorporation rate during cDNA synthesis	Truncation	Shows high specificity and a low detection limit.	The stoppage during cDNA synthesis may result in loss of sequence information and certain chemical small molecules are difficult to obtain	Yes	No	None
	HydraPsiSeq	Chemical	The specific protection of Ψ from hydrazine cleavage, allowing for the retention of intact RNA fragments to precisely locate and quantitatively analyze Ψ sites	Deletion	Exhibits high specificity	Low mapping rates may render it unsuitable for the human genome	Yes	Yes	None
	RBS-seq	Chemical	Ψ is coverted to Ψ-SO32- using bisulphite and hydroquinone, which induces one-base deletion during cDNA synthesis	Deletion	Demonstrates high reactivity	RNA degradation leads to low mapping rates	Yes	No	https://github.com/HuntsmanCancerInstitute/RBSSeqTools
	BID-seq	Chemical		Deletion		RNA degradation occurs, and irreproducibility of mismatch patterns and severe technical biases	Yes	Yes	https://github.com/y9c/pseudoU-BIDseq
	PRAISE	Chemical	Ψ is coverted to Ψ-SO32- using high concentration bisulphite, which induces one-base deletion during cDNA synthesis	Deletion			Yes	Yes	https://github.com/Zhe-jiang/PRAISE
I	ICE-seq	Chemical	The cyanoethylation of inosine blocks reverse transcription during cDNA synthesis	Misincorporation (I-to-G)	Shows high specificity and is not sensitive to mutations during cDNA synthesis and PCR amplification	The miscorporation during cDNA synthesis is not sufficient	Yes	No	https://doi.org/10.1038/nprot.2015.037
	EndoVIPER-seq	Enzymic	Inosine is bound by specific endonuclease eEndoV, which could be further enriched to enhance misincorporation rate during cDNA synthesis	Misincorporation (I-to-G)	Exhibits high specificity and a low detection limit	Results are sensitive to calcium concentration and eEndoV activity	Yes	No	None
Nm	MeTH-seq	Chemical	Low magnesium concentration blocks cDNA synthesis at Nm sites	Truncation	Exhibits+F39:J39 a high truncation rate	Results are sensitive to magnesium concentration	Yes	No	None
	Nm-seq	Chemical	Multiple rounds of OED removes non-Nm nucleotides at 3' end	Truncation	Demonstrates high accuracy	The procedure is tedious, requiring high RNA input and sequencing depth	Yes	No	None
